# Supplementary material
Source: PubMed Central journal article supplement (PMC7727324)
Supplement: NEJMc2032195_appendix.pdf [file NEJMc2032195_appendix.pdf]

## Supplementary Appendix

This appendix has been provided by the authors to give readers additional information about their work.

Supplement to: Widge AT, Roupael NG, Jackson LA, et al. Durability of responses after SARS-CoV-2 mRNA-1273 vaccination. *N Engl J Med*. DOI: 10.1056/NEJMc2032195

**Table of Contents**

**mRNA-1273 Study Group**..... 2

**mRNA-1273 Study Team Members**..... 4

## **mRNA-1273 Study Group**

**(listed in pubmed, and ordered alphabetically by institutional affiliation)**

The following study group members were all closely involved with the design, implementation, and oversight of the mRNA-1273 clinical trial.

Division of Microbiology and Infectious Diseases, National Institute of Allergy and Infectious Diseases, National Institutes of Health, Bethesda, MD. Jae Arega, M.S., John H. Beigel, M.D., Wendy Buchanan, M.S., B.S.N., Mohammed Elsafy, M.D., Binh Hoang, Pharm.D., Sonnie Kim, M.Sc., Aparna Kolhekar, Ph.D., Hyung Koo, B.S.N., Catherine Luke, Ph.D., Mamodikoe Makhene, M.D., M.P.H., Seema Nayak, M.D., Rhonda Pikaart-Tautges, B.S., Paul C. Roberts, Ph.D., Janie Russell, B.S., Elisa Sindall, B.S.N.

The Emmes Company, LLC, Rockville, MD. Jim Albert, M.S., Kaitlyn Cross, M.S., Mat Makowski, Ph.D.

Emory University School of Medicine, Atlanta, GA. Evan J. Anderson, M.D., Amer Bechnak, M.D., Mary Bower, R.N., Andres F. Camacho-Gonzalez, M.D., M.Sc., Matthew Collins, M.D., Ph.D., Ana Drobeniuc, M.P.H., Venkata Viswanadh Edara, Ph.D., Srilatha Edupuganti, M.D., M.P.H., Katharine Floyd, Theda Gibson, M.S., Cassie M. Grimsley Ackerley, M.D., Brandi Johnson, Satoshi Kamidani, M.D., Carol Kao, M.D.; Colleen Kelley, M.D., M.P.H., Lilin Lai, M.D., Hollie Macenczak, R.N., Michele Paine McCullough, M.P.H., Etza Peters, R.N., Varun K. Phadke, M.D., Christina A. Rostad, M.D., Nadine Rouphael, M.D., Erin Scherer Ph.D., D.Phil., Amy Sherman, M.D., Kathy Stephens, R.N., Mehul S. Suthar, Ph.D., Meghan Teherani, M.D., M.S., Jessica Traenkner, P.A., Cynthia Whitney, M.D., Juton Winston, Inci Yildirim, M.D., Ph.D.

Kaiser Permanente Washington Health Research Institute, Seattle, WA. Barbara A. Carste, M.P.H., Maya B. Dunstan, M.S., R.N., Lisa A. Jackson, M.D., M.P.H.

Moderna, Inc., Cambridge, MA. Hamilton Bennett, M.Sc., Nedim Emil Altaras, Ph.D., Andrea Carfi, Ph.D., Marjorie Hurley, Pharm.D., Brett Leav, M.D., Rolando Pajon, Ph.D., Wellington Sun, M.D., Tal Zaks, M.D., Ph.D.

Seattle Children's Research Institute, Seattle, WA. Rhea N. Coler, M.Sc., Ph.D., Sasha E. Larsen, Ph.D.

University of Maryland School of Medicine, Baltimore, MD. Kathleen M. Neuzil, M.D.

University of North Carolina, Durham, NC. Lisa C. Lindesmith, M.S., David R. Martinez, Ph.D., Jennifer Munt, B.S., Michael Mallory, M.P.H., Caitlin Edwards, B.S., Ralph S. Baric, Ph.D.

Vaccine Research Center, National Institute of Allergy and Infectious Diseases, National Institutes of Health, Bethesda, MD. Nina M. Berkowitz, M.P.H., Kevin Carlton, M.S., Kizzmekia S. Corbett, Ph.D., Pamela Costner, R.N., B.S.N., Nicole A. Doria-Rose, Ph.D., Britta Flach, Ph.D., Martin Gaudinski, M.D., Ingelise Gordon, R.N., Barney S. Graham, M.D., LaSonji Holman, F.N.P., Julie E. Ledgerwood, D.O., Bob C. Lin, B.S., Mark K. Louder, John R. Mascola, M.D.,

Adrian B. McDermott, Ph.D., Kaitlyn M. Morabito, Ph.D., Laura Novik, R.N., M.A., Sijy O'Dell, M.S., Marcelino Padilla, B.S., Amarendra Pegu, Ph.D, Stephen D. Schmidt, B.S., Phillip A. Swanson II, Ph.D., Lingshu Wang, Ph.D., Alicia T. Widge, M.D., M.S., Eun Sung Yang M.S., Yi Zhang B.S.

Vanderbilt University Medical Center, Nashville, TN. James D. Chappell, M.D., Ph.D., Mark R. Denison, M.D., Tia Hughes, M.S., Xiaotao Lu, M.S., Andrea J. Pruijssers, Ph.D., Laura J. Stevens, M.S.

Fred Hutchinson Cancer Research Center, Seattle WA. Christine M. Posavad, Ph.D

University of Washington, Seattle, WA. Michael Gale, Jr., Ph.D.

## **mRNA-1273 Study Team Members**

The mRNA-1273 trial was a collective group effort across multiple institutions and locations. Below is a list of sites and staff that significantly contributed to the implementation and conduct of the mRNA-1273 trial (alphabetically by institution).

Division of Microbiology and Infectious Diseases, National Institute of Allergy and Infectious Diseases, National Institutes of Health, Bethesda, MD. Jae Arega, M.S., John H. Beigel, M.D., Wendy Buchanan, M.S., B.S.N., Mohammed Elsafty, M.D., Ranjodh Gill M.P.H., Binh Hoang, Pharm.D., Sonnie Kim, M.Sc., Aparna Kolhekar, Ph.D., Hyung Koo, B.S.N., Marina Lee, Ph.D., Catherine Luke, Ph.D., Mamodikoe Makhene, M.D., M.P.H., Jorge Mejia-Galvis, M.D., Seema Nayak, M.D., Rhonda Pikaart-Tautges, B.S., Paul C. Roberts, Ph.D., Janie Russell, B.S., Elisa Sindall, B.S.N.

The Emmes Company, LLC, Rockville, MD. Jim Albert, M.S., Kaitlyn Cross, M.S., Cassandra Karcs, M.P.H., Pratap Kunwar, M.S., Mat Makowski, Ph.D., Ava Manokian, B.A., Eli Sendra, M.S., Semhal Selamawi, B.A.

Emory University School of Medicine, Atlanta, GA. Alexis Ahonen, N.P., Ghina Alaaeddine, M.D., LaCarles Allen, Evan J. Anderson, M.D., Larry Anderson, M.D., Teresa Ball, R.N., Richard L. Bearden II, Amer Bechnak, M.D., Mary Bower, R.N., Sydney Biccum, Laurel Bristow, M.P.H., Andres F. Camacho-Gonzalez, M.D., M.Sc., Xuemin Chen, M.D., M.S., Laura Clegg, R.N., Matthew Collins, M.D., Ph.D., Ana Drobeniuc, M.P.H., Francine Dyer, R.N., Venkata Viswanadh Edara, Ph.D., Srilatha Edupuganti, M.D., M.P.H., Katharine Floyd, Theda Gibson, M.S., Felicia Glover, Cassie M. Grimsley Ackerley, M.D., Lisa Harewood, Laila Hussaini, M.P.H., Hui-Mien Hsiao, M.S., Brandi Johnson, Satoshi Kamidani, M.D., Carol Kao, M.D., Colleen Kelley, M.D., M.P.H., Peggy Kettle, R.N., Lilin Lai, M.D., Wensheng Li, M.S., Cindy Lubbers, R.N., Hollie Macenczak, R.N., Lisa Macoy, M.S.N., R.N., Michele Paine McCullough, M.P.H., Amy Muchinsky, G. Osinski, Amanda Panepento, Etza Peters, R.N., Varun K. Phadke, M.D., Brittany Robinson, Susan Rogers, R.Ph., Christina Rostad, M.D., Nadine Rouphael, M.D., Youssef Saklawi, M.D., Amber Samuel, Erin Scherer, Ph.D., D.Phil., Amy Sherman, M.D., Oliver Smith, M.S., Kathleen Stephens, R.N., Meghan Teherani, M.D., M.S., Ashley Tippet, M.P.H., Sean Todd, Jessica Traenkner, P.A., Dongli Wang, Cynthia Whitney, M.D., Juton Winston, Terra Jean Winter, Jianguo Xu, Ph.D., RPh, Yongxian Xu, M.D., Inci Yildirim, M.D., Ph.D., and Kathryn Zaks, M.S.

Kaiser Permanente Washington Health Research Institute, Seattle, WA. Lee Barr, R.N., Joyce Benoit, R.N., Heather Beseler, M.B.A., Rachael Burganowski, M.S., Barbara Carste, M.P.H., Joe Choe, B.S., John Dunn, M.D., M.P.H., Maya Dunstan, M.S., R.N., Roxanne Erolin, M.P.H., Jana ffitch, L.P.N., Colin Fields, M.D., Lisa A. Jackson, M.D., Erika Kiniry, M.P.H., De Vona Lang, L.M.P., Susan Lasicka, R.Ph., Stella Lee, B.A., Matthew Nguyen, M.P.H., Jennifer Nielsen, M.N., A.R.N.P., Hallie Phillips, M.ed., Stephanie Pimienta, B.S., David Skatula, R.Ph., Janice Suyehira, M.D., Karen Wilkinson, M.N., A.R.N.P., Michael Witte, Pharm.D.

Moderna, Inc., Cambridge, MA. Nedim Emil Altaras, Ph.D., Hamilton Bennett, M.Sc., Andrea Carfi, Ph.D., Marjorie Hurley, Pharm.D., Brett Leav, M.D., Rodrigo Laureano, M.S., Rolando

Pajon, Ph.D., Wellington Sun, M.D., Tal Zaks, M.D., Ph.D. The Moderna Technical Development and Manufacturing Technical Operations Team.

Seattle Children's Research Institute, Seattle, WA. Rhea N. Coler, M.Sc., Ph.D., Sasha E. Larsen, Ph.D., Tiffany Pecor, B.S., Brian Granger, B.S., L.A.T., Valerie A. Reese, M.S., Evan Cross, B.Sc., Susan L. Baldwin, Ph.D., James M. Ferrenberg M.B., (ASCP) CM, Bryan Berube, Ph.D.

University of Maryland School of Medicine, Baltimore, MD. Kathleen M. Neuzil, M.D.

University of North Carolina, Durham, NC. Lisa C. Lindesmith, M.S., David R. Martinez, Ph.D., Jennifer Munt, B.S., Michael Mallory, M.P.H., Caitlin Edwards, B.S., Ralph S. Baric, Ph.D.

Vaccine Research Center, National Institute of Allergy and Infectious Diseases, National Institutes of Health, Bethesda, MD. Charla Andrews, M.S., Sc.M., Preeti Apte, B.A., Anita Arthur, R.N., B.S.N., Allison Beck, M.P.A.S., P.A.C., Nina M. Berkowitz, M.P.H., Seyhan Boyoglu-Barnum, Ph.D., Eugeania Burch, M.P.H., Kevin Carlton, M.S., Cora Trelles Cartagena, M.P.H., Joe Casazza, M.D., Ph.D., Emily Coates, Ph.D., Kizzmekia S. Corbett, Ph.D., Pamela Costner, R.N., B.S.N., Jennifer Cunningham, R.N., B.S.N., Nicole A. Doria-Rose, Ph.D., Aba Eshun, R.N., B.S.N., Catina Evans, Britta Flach, Ph.D., Martin Gaudinski, M.D., Rebecca A. Gillespie, B.S., Ingelise Gordon, R.N., Barney S. Graham, M.D., Carmencita S Graves M.S., M.B.A., Mercy Guech, Ph.D., Cynthia Starr Hendel, C.R.N.P., Renunda Hicks, LaSonji Holman, F.N.P., Kate Houser, Ph.D., Justine Jones, B.S., Brenda Larkin, R.N., B.S.N., Lam Le, M.B.A., Julie E. Ledgerwood, D.O., Bob C. Lin, B.S., Lauren Lizewski, M.P.H., Mark K. Louder, John R. Mascola, M.D., Adrian B. McDermott, Ph.D., Floreliz Mendoza, R.N., John Misasi, M.D., Kaitlyn M. Morabito, Ph.D., Patricia Morgan, P.A., M.Sc., Thuy Nguyen, B.A., Laura Novik, R.N., M.A., Mark O'Callahan, B.S., Sijy O'Dell, M.S., Abidemi Ola, M.S.N., F.N.P.-C., Marcelino Padilla, B.S., Karen Parker, D.N.P., C.R.N.P., F.N.P.-B.C., Amarendra Pegu, Ph.D, Iris Pittman, B.A., Sarah Plummer, C.R.N.P., La'Shawn Requilman, Ro Rothwell, Ph.D., Jamie Saunders, R.N., B.S.N., Stephen D. Schmidt, B.S., Ellie Seo, R.Ph., Ph.D., Sandra Sitar, M.S., Phillip A. Swanson II, Ph.D., Stephanie Taylor, B.A., Shinyi Telscher, Pharm.D., Colin Tran, B.S., Olga Trofymenko, M.D., Olga Vasilenko, M.S., Xiaolin Wang, R.N., William Whalen, R.N., B.S.N., Pernel Williams, B.A., Eun Sung Yang, M.S., Phillip A. Swanson II, Ph.D., Lingshu Wang, Ph.D., Alicia T. Widge, M.D., M.S., Galina Yamshchikov, M.S., Eun Sung Yang M.S., Kathy Zephir, R.N., B.S.N., M.S., Yi Zhang, B.S.

Vanderbilt University Medical Center, Nashville, TN. James D. Chappell, M.D., Ph.D., Mark R. Denison, M.D., Tia Hughes, M.S., Xiaotao Lu, M.S., Andrea J. Pruijssers, Ph.D., Laura J. Stevens, M.S.

Fred Hutchinson Cancer Research Center, Seattle, WA. Christine M. Posavad, Ph.D.

University of Washington, Seattle WA. Michael Gale, Jr., Ph.D.,

### **Additional Contributors**

Below is a list of sites and staff that contributed serum samples from, and information on, Covid-19 convalescent patients:

University of Washington Department of Medicine, Seattle WA. Helen Chu, M.D, M.P.H.

Aaron Diamond AIDS Research Center and Columbia University, New York NY. David Ho, M.D.

Vanderbilt Institute for Clinical and Translational Research, Nashville TN. Gordon Bernard, M.D.
